# Supplementary material
Source: HighWire-hosted journal article supplement (https://bmjopen.bmj.com/content/13/11/e079063)
Supplement: inline-supplementary-material-4 [file inline-supplementary-material-4.pdf]

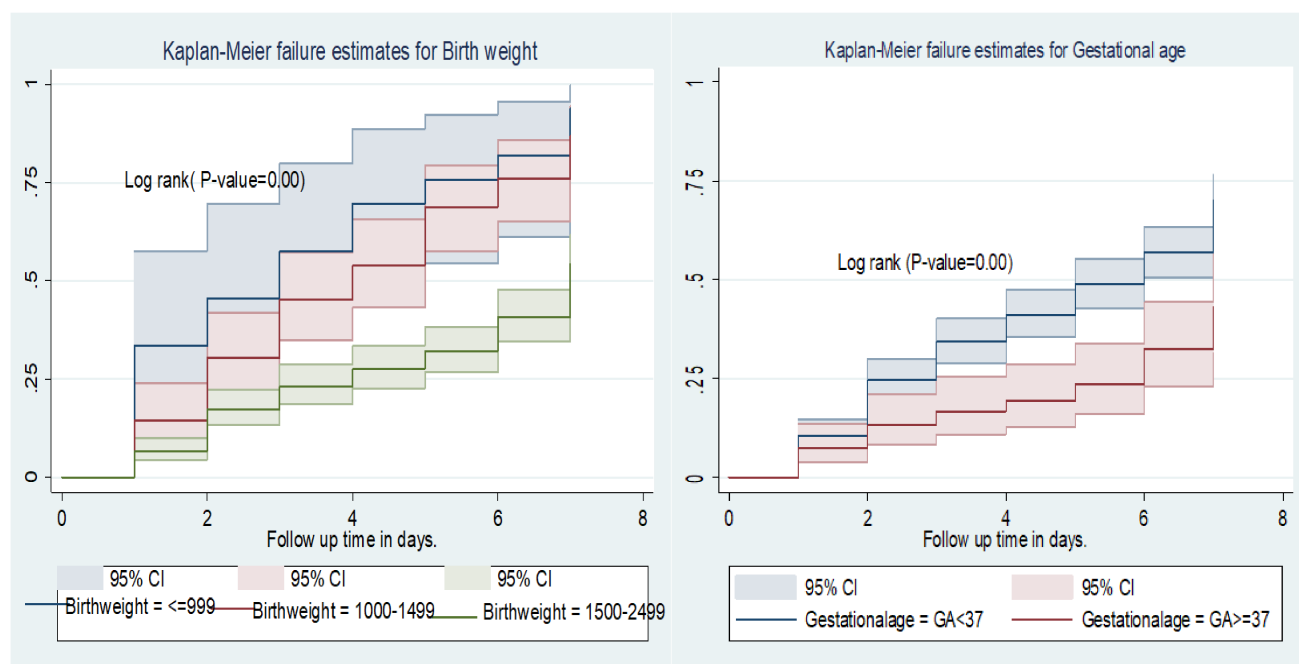

A)

B)

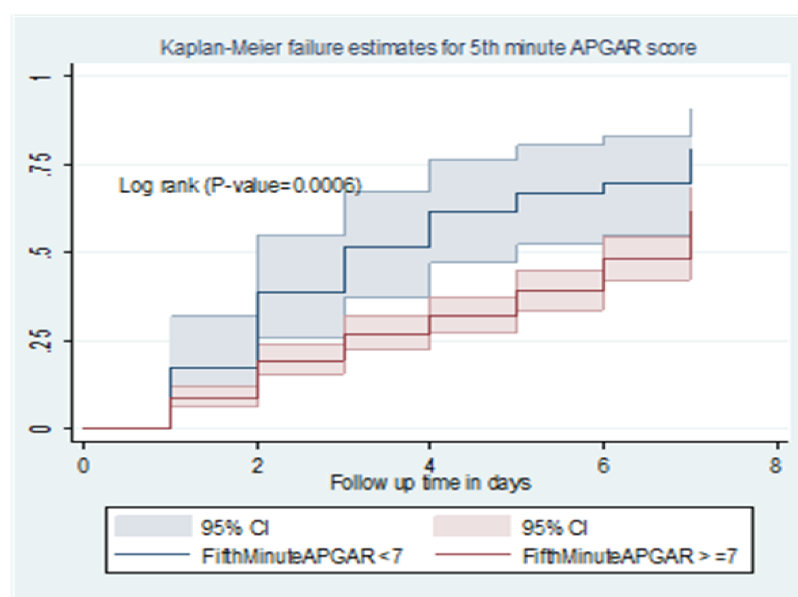

C)

Supplementary figure 1: The Kaplan Meier failure estimates of low birth weight early neonates with respect to (A) Birth weight, (B); Gestational age, (C); Fifth minute APGAR score in Northwest Ethiopia CSH, from September 19, 2021, to January 1, 2023 (n=405).
